# Supplementary material for: Graphene/polyaniline electrodeposited needle trap device for the determination of volatile organic compounds in human exhaled breath vapor and A549 cell
Source: Royal Society of Chemistry journal article supplement (doi:10.1039/c6ra25453e), 2017-01-01
Supplement: c6ra25453e1.pdf [file c6ra25453e1.pdf]

Supporting Information for

**Graphene/polyaniline electrodeposited needle trap device for the  
determination of volatile organic compounds in human exhaled  
breath vapor and A549 cell**

Yu Li, JingHong Li, Hui Xu\*

Key Laboratory of Pesticide & Chemical Biology, Ministry of Education, Institute of  
Environmental Chemistry, College of Chemistry, Central China Normal University,  
Wuhan, 430079, China

Correspondence: Hui Xu, Ph D, Key Laboratory of Pesticide & Chemical Biology,  
Ministry of Education, College of Chemistry, Central China Normal University,  
Wuhan, 430079, People's Republic of China

Email: [huixu@mail.ccnu.edu.cn](mailto:huixu@mail.ccnu.edu.cn)

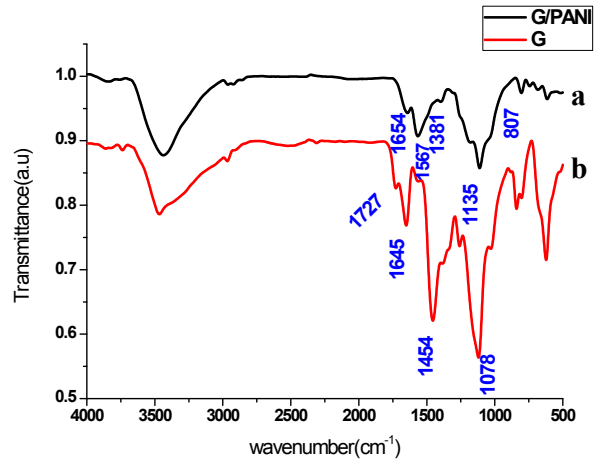

Figure S1. FTIR spectra of graphene and the electrodeposited G/PANI coating.

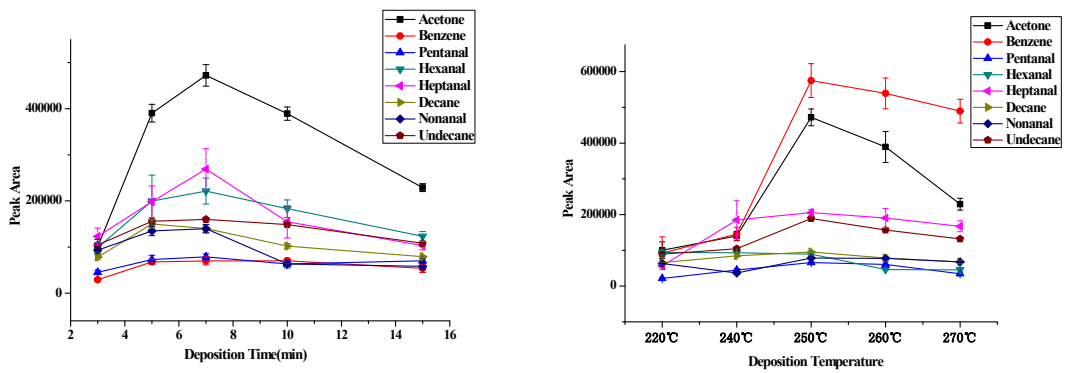

Figure S2. Selection of desorption conditions. (A) Desorption time, (B) Desorption temperature. Standard aldehydes solution:  $2 \mu\text{g L}^{-1}$ .

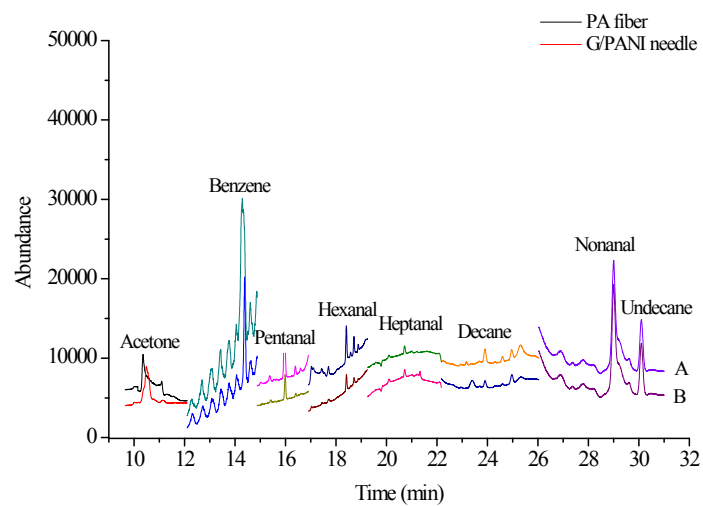

Figure S3. GC-MS-SIM Chromatograms of VOCs in EBV samples of lung cancer patient extracted by two sorbents (A: PA SPME fiber, B: G/PANI needle).
